# Supplementary material for: Activated MEK cooperates with Cdkn2a and Pten loss to promote the development and maintenance of melanoma
Source: PubMed Central journal article supplement (PMC5501768; doi:10.1038/onc.2016.526), 2017-03-06

# Supplementary Figure 5.

**A**

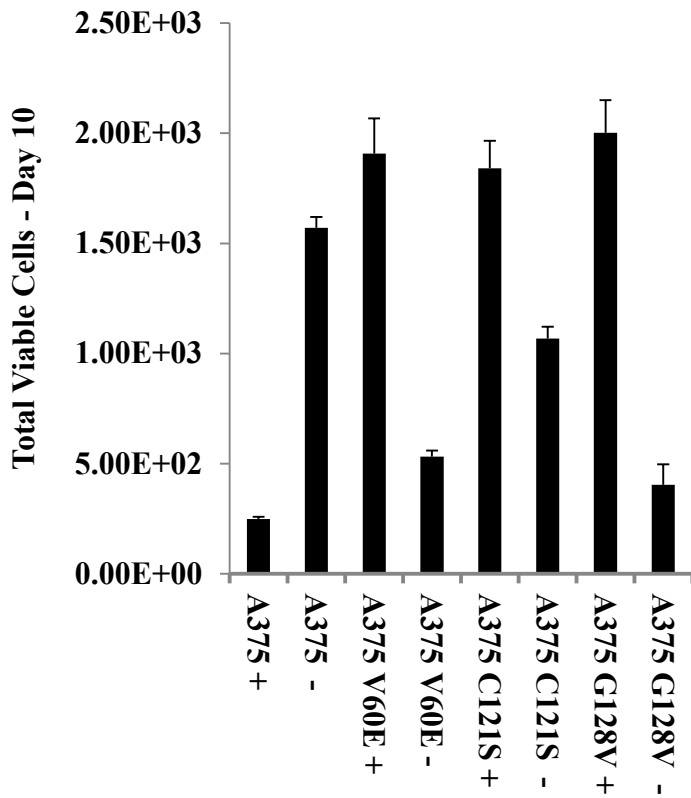

**C**

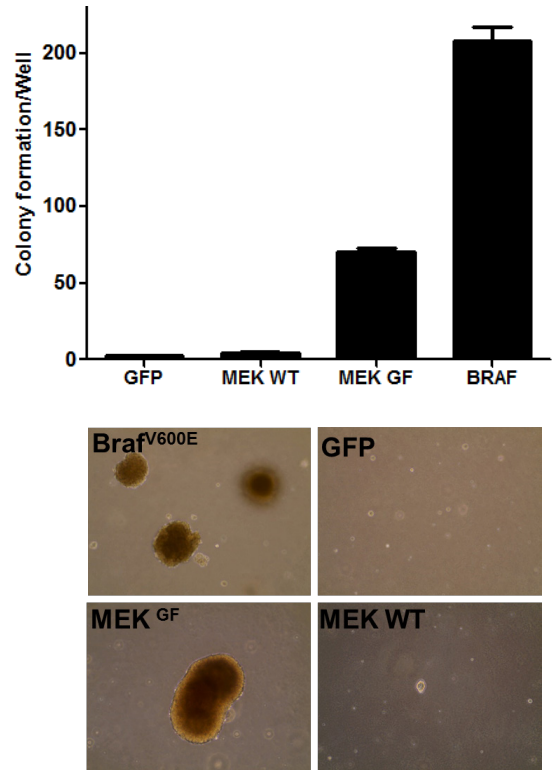

**B**

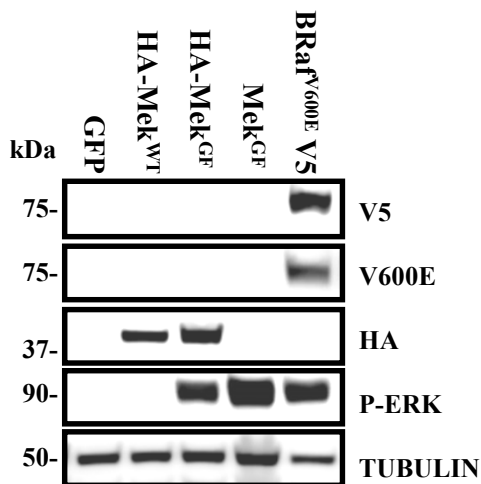

**D**

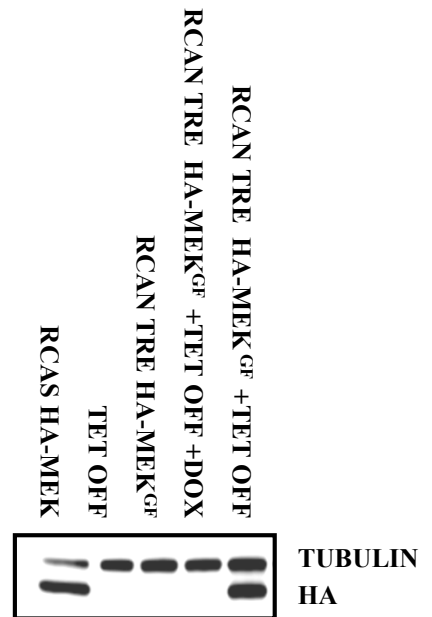

Supplement: NIHMS868914-supplement-Figure_S5.pdf [file NIHMS868914-supplement-Figure_S5.pdf]
